# Supplementary material
Source: Frontiers journal article supplement (https://www.frontiersin.org/articles/406332)
Supplement: Data_Sheet_2.PDF [file Data_Sheet_2.PDF]

1 The EnvZ-OmpR Two-Component Signaling System Is Inactivated In  
2 A Mutant Devoid Of Osmoregulated Periplasmic Glucans In *Dickeya*  
3 *dadantii*

4  
5  
6 Caby Marine<sup>1</sup>, Sébastien Bontemps-Gallo<sup>1‡</sup>, Peggy Gruau<sup>1</sup>, Brigitte Delrue<sup>2</sup>, Edwige Madec<sup>1</sup>,  
7 Jean-Marie Lacroix<sup>1\*</sup>

8  
9  
10 <sup>1</sup> Unité de Glycobiologie Structurale et Fonctionnelle, UMR CNRS 8576, Université des Sciences et  
11 Technologies de Lille, Université de Lille, F-59655 Villeneuve d'Ascq, France

12 <sup>2</sup> Université de Lille, F-59655 Villeneuve d'Ascq, France

13  
14 \*corresponding author.

15 E-mail: [jean-marie.lacroix@univ-lille.fr](mailto:jean-marie.lacroix@univ-lille.fr).

16  
17 ‡present address: Center for Infection and Immunity of Lille, U1019-UMR8204, Institut Pasteur de Lille,  
18 Inserm, CNRS, Université de Lille, France.

**Deleted:** ‡present address : Laboratory of Bacteriology, National Institute of Allergy and Infectious Diseases, National Institute of Health, Hamilton, MT, United States of America.

19  
20 Running title: Relationship EnvZ/OmpR & OPG

21  
22 Number of Figures: 8

23 Number of words: 5,145

**Deleted:** 5545

24  
25 Keywords

26 EnvZ/OmpR, osmoregulated periplasmic glucans, osmotic stress, plant pathogen, *D. dadantii*

31 **Abstract**

32 Osmoregulated periplasmic glucans (OPGs) are general constituents of alpha-, beta- and  
33 gamma-Proteobacteria. This polymer of glucose is required for full virulence of many  
34 pathogens including *Dickeya dadantii*. The **phytopathogenic** enterobacterium *D. dadantii*  
35 causes soft-rot disease **in** a wide range of **plants**. An OPG-defective mutant is impaired in  
36 environment sensing. We **previously** demonstrated that i) fluctuation of OPG concentration  
37 controlled the activation level of the RcsCDB system, **and** ii) RcsCDB, **along** with EnvZ/OmpR  
38 **controlled** the **mechanism of** OPG succinylation. These previous data lead us to explore whether  
39 OPGs are required for other two-component **systems**. In this study, we **demonstrate** that  
40 inactivation of the EnvZ/OmpR system in an OPG-defective mutant **restores** full synthesis of  
41 pectinase but only **partial** virulence. Unlike for **the** RcsCDB system, the EnvZ-OmpR system  
42 is not controlled by OPG concentration but **requires** OPGs for proper activation.

Deleted: phytopathogen

Deleted: on

Deleted: plant

Deleted:

Deleted: previously

Deleted: controlled

Deleted: mechanism

Deleted: the

Deleted: system

Deleted: demonstrated

Deleted: restored

Deleted: partially

Deleted: the

Deleted: required

## 58 Introduction

59 Osmoregulated periplasmic glucans (OPGs),  $\beta$ -D-glucans oligosaccharides, are major  
60 **envelope** components found in **the periplasm of** almost all proteobacteria. **Their** concentration  
61 increases as the osmolarity of the medium decreases (Kennedy, 1996; Bohin and Lacroix, 2006;  
62 Bontemps-Gallo et al., 2017). In enterobacteria, the **gene products of the *opgGH*** operon  
63 **synthesize the OPG** glucose backbone, **which is** composed of 5-12 glucose units joined by  $\beta$ ,1-  
64 2 linkages and branched by  $\beta$ ,1-6 linkages. *opgG* and *opgH* mutant strains are completely  
65 devoid of OPGs (Bontemps-Gallo et al., 2017). These glucans are well described **as** virulence  
66 factors **of** animal and plant **pathogens** including *Dickeya dadantii* (Bontemps-Gallo and  
67 Lacroix, 2015).

68 *D. dadantii*, **the** agent of soft rot disease, is directly responsible for 5 to 25% of potato  
69 **crop loss** in Europe and Israel (Toth et al., 2011). This phytopathogen is listed as **an** A2  
70 quarantine organism by the European and Mediterranean Plant Protection Organization (EPPO,  
71 1982; 1988; 1990). Maceration is the result of the synthesis and secretion of plant cell wall-  
72 degrading enzymes (PCWDEs), **in particular**, pectinases (Collmer and Keen, 1986). **However**,  
73 additional factors, **such as motility**, are required for full virulence (Charkowski et al., 2012;  
74 Reverchon and Nasser, 2013; Leonard et al., 2017). During infection, *D. dadantii* **must**  
75 overcome several stresses including osmotic stress. Previous studies suggest that bacteria  
76 encounter hypoosmotic stress **at the early stage of infection and** hyperosmotic stress **later** due  
77 to plant maceration (Reverchon and Nasser, 2013; Jiang et al., 2016; Reverchon et al., 2016).

78 In our model, **OPG** concentration dramatically **increases** during the first hour of  
79 infection (Bontemps-Gallo et al., 2013). Mutants devoid of OPGs show a pleiotropic phenotype  
80 including a loss of motility, decreased synthesis and secretion of PCWDEs, increased synthesis  
81 of exopolysaccharide, induction of a general stress response and complete loss of virulence on  
82 potato tubers or chicory leaves (Page et al., 2001; Bouchart et al., 2007). These phenotypes  
83 suggest that strains **lacking** OPGs are impaired in the **sensing** of their environment. **Previously**,  
84 our laboratory demonstrated a strong relationship between OPGs and the RcsCDB two-  
85 component system.

86 Two-component systems are key regulators of gene expression plasticity in response to  
87 environmental changes. Under stimuli, often unknown, a transmembrane sensor histidine  
88 kinase (HK) autophosphorylates on a histidine residue. **This** phosphate group **is subsequently**  
89 **transferred** to an aspartate residue **on a** cognate cytoplasmic response regulator (RR), which in  
90 turn regulates the expression of **a set of** target genes (Hoch, 2000; Groisman, 2016).

Deleted: of the envelope

Deleted: periplasm. The

Deleted: products

Deleted: to be a

Deleted: for

Deleted: pathogen

Deleted: the

Deleted: from

Deleted: the losses of

Deleted: crops

Deleted: a

Deleted: a set of

Deleted: particularly

Deleted: , but many

Deleted: like the motility

Deleted: the

Deleted: has to

Deleted: first a

Deleted: prior a

Deleted: OPGs

Deleted: increased

Deleted: the

Deleted: devoid of

Deleted: perception

Deleted: Last decade

Deleted: the

Deleted: the

Deleted: , transfers, directly or not, this

Deleted: of its

Deleted: )

Deleted: of its regulon

122 **Inactivation** of the RcsCDB system, in an OPG-defective mutant restores several of the  
 123 *D. dadantii* wild-type phenotypes (motility, mucoidy, virulence) (Bouchart et al., 2010),  
 124 indicating that OPGs are involved in the perception of environmental changes. We **have** also  
 125 **shown** that RcsCDB and OPG are tightly connected: i) fluctuation of OPG concentration  
 126 **controls** the activation level of the RcsCDB system (Bontemps-Gallo et al., 2013), ii) RcsCDB  
 127 **along** with the two-component system EnvZ/OmpR, **controls** the **mechanism of** OPG  
 128 succinylation (Bontemps-Gallo et al., 2016). **These** facts lead us to wonder whether the link  
 129 between OPGs and the RcsCDB system is a unique feature.

130 **Thirty years ago**, Fiedler and Rotering isolated revertants in OPG-defective mutants of  
 131 *E. coli* (Fiedler and Rotering, 1988). The mutation was localized **to** the *ompB* locus **now** known  
 132 **as the** *envZ-ompR* operon. EnvZ-OmpR, the paradigm of two-component **systems**, **regulates** the  
 133 balance between OmpF (large pore diameter) and OmpC (small pore diameter) to control the  
 134 **diffusion rate** of nutrients (Cowan et al., 1992; Forst and Roberts, 1994; Egger et al., 1997;  
 135 Castillo-Keller et al., 2006; Barbieri et al., 2013). This system is also known to control motility  
 136 in several bacteria (Barker et al., 2004; Clemmer and Rather, 2007; Raczkowska et al., 2011;  
 137 Lee and Park, 2013; Li et al., 2014; Tipton and Rather, 2016; Pruss, 2017) and is required for  
 138 full virulence in *Yersinia pestis* (Gao et al., 2011; Reboul et al., 2014). In *D. dadantii*, the  
 139 EnvZ/OmpR system regulates *ompF* expression (no *ompC* homolog **is present**) but also *kdgN*,  
 140 **which is** required for transport of oligosaccharides **arising from** **pectin** degradation during plant  
 141 infection (Condemine and Ghazi, 2007). Recently, in a global *in vitro* transcriptomic analysis  
 142 of various stresses **encountered** during the infectious process, Jiang *et al.* **showed that the** EnvZ-  
 143 OmpR **system** was up-regulated **during osmotic stress** (Jiang et al., 2016).

144 In this study, we **demonstrate** that EnvZ-OmpR system **is** not involved in virulence.  
 145 **Instead**, inactivation of *envZ* or *ompR* in an OPG-defective mutant **restores** full synthesis of  
 146 pectinase and **partial** virulence. We also **show** that EnvZ-OmpR **is** involved in **regulation of**  
 147 **motility**. Finally, we **demonstrate** that *ompF* and *kdgN* **are** osmoregulated by EnvZ-OmpR and  
 148 **are** required **for proper regulation of** OPGs.

## 150 Materials and Methods

### 151 Bacterial strains, media and growth conditions

152 Bacterial strains are described in Table 1. Bacteria were grown at 30°C in lysogeny  
 153 broth (LB) (Bertani, 2004), or in minimal medium M63 glycerol (15mM (NH<sub>4</sub>)<sub>2</sub>SO<sub>4</sub>, 1.8μM  
 154 FeSO<sub>4</sub>, 1mM MgSO<sub>4</sub> and 100mM K<sub>2</sub>PHO<sub>4</sub>) supplemented with 0.2% glycerol as a carbon

Deleted: The inactivation

Deleted: ,

Deleted:

Deleted: demonstrated

Deleted: controlled

Deleted: controlled

Deleted: mechanism

Deleted: All these

Deleted: the

Deleted: In *E. coli*

Deleted:

Deleted: thirty years ago

Deleted: in

Deleted: now

Deleted: the

Deleted: system, is described to regulate

Deleted: rate

Deleted: resulting

Deleted: pectins

Deleted: encounter

Deleted: show

Deleted: during osmotic stress

Deleted: demonstrated

Deleted: was

Deleted: but

Deleted: restored

Deleted: partially the

Deleted: showed

Deleted: was

Deleted: motility

Deleted: demonstrated

Deleted: were

Deleted: to be properly regulated

188 source (Miller, 1992). Solid media were obtained by adding agar at 15 g.L<sup>-1</sup>. Motility tests were  
189 performed on LB plates containing agar at 4 g.L<sup>-1</sup>.

190 Osmolarity (mOsM) was measured with a vapor pressure osmometer (Advanced  
191 Instruments, USA). M63 osmolarity was 330 mOsM. Osmolarity was decreased by diluting  
192 two-fold M63 with H<sub>2</sub>O to 170 mOsM. Addition of 0.1M and 0.2M NaCl increased the  
193 osmolarity to 500 and 700 mOsM, respectively. Glycerol was added after dilution with water  
194 or addition of NaCl.

195 The solid media used to test the pectinase (M63 supplemented with 0.4%  
196 polygalacturonate (PGA) and 0.2% glycerol), cellulases (M63 supplemented with 0.2%  
197 carboxymethylcellulose (CMC), 0.2% glycerol and 7mM MgSO<sub>4</sub>) and proteases (LB  
198 complemented with 1% of Fat milk) activities have been described previously (Page et al.,  
199 2001).

200 Antibiotics were used at following concentrations: spectinomycin, 2.5µg.mL<sup>-1</sup>;  
201 chloramphenicol, 12.5µg.mL<sup>-1</sup> and gentamycin, 2µg.mL<sup>-1</sup>.

## 202 **Transduction, conjugation and transformation.**

203 Construction of strains was performed by transferring genes from one strain of *D.*  
204 *dadantii* to another by generalized transduction with phage ΦEC2 as described previously  
205 (Resibois et al., 1984). Plasmids were introduced in *D. dadantii* by conjugation or  
206 electroporation.  
207

## 208 **Expression analysis**

209 Bacteria were grown up to exponential phase at various osmolarities. RNAs were  
210 extracted using Nucleospin RNA Plus Kit (Macherey Nagel) following the manufacturer's  
211 instruction. RNAs were treated with DNase I (BioLabs). RNA qualities were checked by gel  
212 and nanodrop.  
213

214 cDNAs were retrotranscribed using the Superscript IV First-Strand Synthesis  
215 (Invitrogen) according to the manufacturer's instruction.  
216 qPCR was performed using SYBR method as described previously by Hommais *et al.*  
217 (Hommais et al., 2011). Primers used are listed in Table 2. *ipxC*, an UDP-N-acetylglucosamine  
218 deacetylase, was used as a reference gene (Hommais et al., 2011).

## 219 **Phenotypic evaluation**

Deleted: made

Deleted: in media

Formatted: Justified

Moved down [1]: Swim diameters were measured after 48 hours of incubation.

Deleted:   
Motility assay  
10<sup>7</sup> bacteria in 5µL were spotted into the motility plate, incubated at 30°C.

Deleted: Proteases, cellulases and proteases assays  
10<sup>7</sup> bacteria in 5µL were spotted onto pectinase (PGA), cellulase (CMC) or protease plate.

Deleted: indication of pectinase production. After 48h incubation, CMC plates were flooded with a 1mg/ml red Congo solution and washed several time with 1M NaCl, allowing the formation of a red complex with the CMC. Diameters of the clear haloes around the colony were measured as indication of cellulase production.

Moved down [2]: After 48h incubation, PGA plates were flooded with a 10% copper acetate solution, which forms a blue complex with the PGA. Diameters of the clear haloes around the colony were measured as

Moved down [3]: After 48h incubation, abilities of the strain to degrade milk protein were observed.

Deleted:

245 10<sup>7</sup> bacteria in 5µL were spotted onto pectinase (PGA), cellulase (CMC), protease or  
 246 motility plates. After 48h incubation, PGA plates were flooded with a 10% copper acetate  
 247 solution, which forms a blue complex with the PGA. Diameters of the clear haloes around the  
 248 colony were measured as an indication of pectinase production. After 48h incubation, CMC  
 249 plates were flooded with a 1mg/ml red Congo solution and washed several time with 1M NaCl,  
 250 allowing formation of a red complex with the CMC. Diameters of the clear haloes around the  
 251 colony were measured as an indication of cellulase production. After 48h incubation, abilities  
 252 of the strain to degrade milk protein were observed. Swim diameters were measured after 48  
 253 hours of incubation.

Moved (insertion) [2]

Moved (insertion) [3]

Moved (insertion) [1]

Formatted: Left

## 255 Pathogenicity test.

256 Potato tubers and chicory leaves were inoculated as previously described (Page et al.,  
 257 2001). Bacteria from an overnight culture in LB medium were recovered by centrifugation and  
 258 diluted in water. For potato tubers, sterile pipette tips containing a bacterial suspension of 10<sup>7</sup>  
 259 cells in 5µL were inserted into the tuber (Amandine variety). After 72h of incubation in a dew  
 260 chamber, tubers were sliced vertically through the inoculation point, and the weight of the  
 261 maceration was measured. For chicory leaves, leaves were wounded prior inoculation of 10<sup>7</sup>  
 262 bacteria and incubated in a dew chamber at 30°C until 48h.

## 264 Transmission electron microscopy

265 Samples were analyzed by the Bio Imaging Center of University of Lille (France). Wild-  
 266 type and *opgG* strains were grown until mid-log phase. Cells were spun for 5 min at 7,000 x g  
 267 at 4°C. Bacteria were fixed with 3.125% glutaraldehyde, washed in 0.1M phosphate buffer pH  
 268 7.4 and postfixed with 1% OsO<sub>4</sub>. Samples were dehydrated with graded acetone series,  
 269 embedding in EMBED resin, and air dried at 60°C. Thin and ultrathin sections were prepared  
 270 using an ultramicrotome (Reichert OM U3) or an ultramicrotome (LKB Ultratome III 8800)  
 271 and stained with uranyl acetate. Microscopy was performed with a Hitachi H600 microscope at  
 272 75keV electron energy. The periplasm length was measured using ImageJ software.

Deleted: The samples

Deleted: strain

## 274 Statistical Analysis

275 For statistical analyses, Graph-prism6 software was used to analyze data using One-  
 276 Way ANOVA.

## 278 Results

## 281 Characterization of *envZ* and *ompR* deletion in wild-type and *opgG* background

282 To determine whether the EnvZ-OmpR system interacts with OPG, we inactivated *envZ*  
283 or *ompR* in wild-type and *opgG* mutant backgrounds (Figure 1A). We then looked at *envZ* and  
284 *ompR* expression at various osmolarities (Figure 1B). As expected, expression of both genes  
285 was low in wild-type and not affected by osmolarity. In an *opgG* mutant, the expression level  
286 was similar to that observed in the wild-type strain. No expression of *envZ* or *ompR* was  
287 observed in their respective mutant strain. Interestingly, in the *ompR* background, a low but  
288 measurable expression of *envZ* was observed. Based on the locus organization, we would expect  
289 the *ompR* mutation to be polar. Expression of *envZ* in an *ompR* deletion background suggests  
290 the presence of a secondary promoter.

## 292 Inactivation of *envZ* or *ompR* restores the synthesis of pectinase in an OPG-defective 293 strain

294 Strains devoid of OPGs are impaired in their ability to synthesize virulence factors,  
295 leading to total loss of virulence. We first assayed plant cell-degrading enzyme activity (Figure  
296 2, Supplementary Figure 1), which is required for full virulence. Pectinase production and  
297 secretion were evaluated on minimal medium containing polygalacturonate, a substrate for  
298 pectinase, and, after 48h of incubation, haloes of degradation were measured (Figure 2A). As  
299 expected, the *opgG* mutant showed a 40% decrease in pectinase production compared to the  
300 wild-type. While inactivation of *envZ* or *ompR* did not decrease synthesis of pectinases, *envZ*  
301 *opgG* and *ompR* *opgG* double mutants showed full restoration of pectinase production to levels  
302 similar to wild-type.

303 Cellulase production and secretion were evaluated on minimal medium containing  
304 carboxymethylcellulose, the substrate for cellulase, and haloes of degradation were measured  
305 after 48 h of incubation (Figure 2B). As previously shown, *opgG* inactivation decreased  
306 production of cellulase by 30% (Page et al., 2001). *envZ* or *ompR* null mutants exhibited similar  
307 cellulase levels as the wild-type. *envZ* *opgG* and *ompR* *opgG* double mutants displayed a  
308 reduction in cellulase production similar to the *opgG* strain.

309 We also assayed for production of protease on plates containing 1% milk fat (Table 3).  
310 The ability of each strain to degrade milk protein was evaluated after 48 h. No restoration of  
311 protease activity was observed in any of the double-mutant strains.

312 Taken together, our data show that EnvZ-OmpR is not involved in regulation of  
313 PCWDEs. However, disruption of either *envZ* or *ompR* is enough to restore full pectinase  
314 production in an OPG-defective strain, but not cellulase or protease synthesis.

Deleted: deletion

Deleted: In order to

Deleted: interact

Deleted: ,

Deleted: in wild-type and *opgG* background

Deleted: the

Deleted: as

Deleted: relative

Deleted: strains

Deleted: thought that

Deleted: will

Deleted: The expression

Formatted

... [1]

Deleted: restored

Deleted: OPG-

Deleted: strains

Deleted: the

Deleted: the

Deleted: )

Deleted: plates with

Deleted: : polygalacturonate. After

Deleted: the

Deleted: decreased of

Deleted: of the pectinases

Deleted: the

Deleted: a

Deleted: the pectinases at a

Deleted: level than the

Deleted: plates with

Deleted: : carboxymethylcellulose. After 48h of incubation, the

Deleted: by 30% the

Deleted: as showed previously

Deleted: a

Deleted: level of

Deleted: than

Deleted: of

Deleted: like

Deleted: the

Deleted: plate

Deleted: of Fat

Deleted: After 48h of incubation, abilities

Deleted: were

Deleted: activities

Deleted:

Deleted: showed

Deleted: PCWDEs

Deleted: was

Deleted:



362

### 363 The EnvZ-OmpR system is involved in motility regulation

364 ~~Motility~~ is ~~known~~ to be an important virulence factor (Reverchon and Nasser, 2013).  
 365 Furthermore, ~~by screening motility in OPG-defective mutants of E. coli~~, Fiedler and Rotering  
 366 isolated revertants in ~~the envZ-ompR operon~~ (Fiedler and Rotering, 1988). ~~To~~ determine  
 367 whether disruption of *envZ-ompR* could restore the loss of motility in the *opgG* mutant, we  
 368 assayed ~~for~~ motility by measuring swim diameters on 0.4% agar plates (Figure 3A,  
 369 Supplementary Figure 1). As described previously, the *opgG* mutant showed ~~a reduction in~~  
 370 ~~motility (one third of wild-type levels)~~. Inactivation of *envZ* or *ompR* ~~resulted in a 40%~~  
 371 ~~reduction in~~ motility compared to the wild-type strain. However, the same mutation in the *opgG*  
 372 background did not restore ~~motility~~.

373 The regulatory cascade ~~for~~ motility is separated ~~into~~ three ~~classes~~ of promoter (Figure  
 374 3B). Under motility-inducing ~~conditions~~, *flhDC*, the master regulator, is up-regulated to  
 375 modulate ~~expression of genes under the control of~~ a class II promoter. Finally, class II genes  
 376 regulate ~~genes~~ with class III ~~promoters~~ (e.g. *fliC*, the flagellin). We ~~next~~ tested the effect of the  
 377 EnvZ-OmpR system on ~~regulation of motility~~. In wild-type background, ~~expression of~~ the  
 378 master regulator *flhD*, and consequently *fliC*, ~~decreased~~ ten-fold from low (170 mOsM) to high  
 379 (700 mOsM) ~~osmolarity~~ (Figure 3C, D). This data ~~agrees~~ with our previous observation of a  
 380 two-fold decrease ~~in~~ wild-type motility in the same ~~osmolarity range~~ (Bontemps-Gallo et al.,  
 381 2013). Inactivation of *envZ* or *ompR* ~~lead~~ to a decrease ~~in flhD expression~~, but, ~~save for 170~~  
 382 ~~mOsM, this decrease was~~ not statistically significant (Figure 3C). *fliC* expression decreased  
 383 ~~1.5-fold at 170 and 330 mOsM in the envZ and ompR mutants~~ compared to the wild-type (Figure  
 384 3C, D). Disruption of *opgG* resulted in low expression of both *flhD* and *fliC* regardless ~~of the~~  
 385 genetic background and ~~osmolarity~~ (Figure 3C, D). Our results ~~show~~ that EnvZ-OmpR are  
 386 involved in the regulation of ~~motility~~ but not as a main regulator of ~~this~~ cascade. Inactivation  
 387 of this system cannot rescue ~~motility~~ in the *opgG* background.

### 389 Inactivation of EnvZ-OmpR systems partially ~~restores~~ virulence in an OPG ~~defective~~ 390 strain

391 Previously, we demonstrated that restoration of ~~pectinase~~ production ~~in~~ an OPG-  
 392 defective strain is enough to restore virulence in potato tubers but not in chicory leaves  
 393 (Bontemps-Gallo et al., 2014). We observed that inactivation of the EnvZ-OmpR system in an  
 394 *opgG* mutant lead to ~~restoration of~~ full pectinase synthesis (Figure 2A). We ~~therefore~~  
 395 ~~determined whether~~ inactivation of this system could restore ~~virulence~~ in both potato tubers

- Deleted: The motility
- Deleted: described
- Deleted: in E.
- Deleted: in OPG defective mutants by screening motility thirty years ago
- Deleted: In order to
- Deleted: the
- Deleted: the
- Deleted: motility.
- Deleted: in the wild-type displayed a reduction of
- Deleted: of the
- Deleted: the
- Deleted: of
- Deleted: in
- Deleted: class
- Deleted: environmental
- Deleted: gene
- Deleted: with
- Deleted: those
- Deleted: gene
- Deleted: promoter
- Deleted: the motility
- Deleted: . Expressions
- Deleted: were decreasing
- Deleted: osmolarities
- Deleted: agreed
- Deleted: of the
- Deleted: ranged of
- Deleted: leaded
- Deleted: slight
- Deleted: (
- Deleted: except at 170 mOsM) of *flhD* expression
- Deleted: However,
- Deleted: of
- Deleted: at 170 and 330 mOsM
- Deleted: a
- Deleted: osmolarities
- Deleted: showed
- Deleted: the
- Deleted: the regulatory
- Deleted: the
- Deleted: restored the
- Deleted: the
- Deleted: of pectinase
- Deleted:
- Deleted: restore
- Deleted: assayed if the
- Deleted: the



(Figure 4, Supplementary Figure 1) and chicory leaves (Figure 5). Following inoculation of bacteria in both vegetables and incubation at 30°C, we analyzed virulence levels. Inactivation of *envZ* or *ompR* in a wild-type background had no effect on virulence levels regardless of the infection model used (Figures 4, 5). Interestingly, when the system was inactivated in an OPG-defective strain, macerations were observed in the tubers (Figure 4). However, severity of disease was not as strong as for the wild-type strain (only a third of the average maceration weight of the wild-type). No restoration of virulence was observed for *envZ* *opgG* or *ompR* *opgG* double mutants in chicory leaves (Figure 5). Our data demonstrate that EnvZ-OmpR is not involved in virulence in *D. dadantii*. Furthermore, restoration of pectinase synthesis in the double mutants allows for maceration but only in potato tubers.

#### ***ompF* and *kdgN* are osmoregulated through EnvZ-OmpR and require OPG for regulation**

In *D. dadantii*, EnvZ-OmpR regulates at least two genes involved in transport: *ompF* and *kdgN* (Condemine and Ghazi, 2007). *KdgN* transports oligosaccharides arising from pectin-mediated degradation during plant infection. *OmpF* is a porin with a pore diameter of 1.12 nm that allows non-specific import of hydrophilic metabolites of less than 600 Da. We analyzed expression of these two genes at 170, 330, 500 and 700 mOsM in a wild-type background (Figure 6A, B). Expression increased sixteen-fold for *ompF* and twenty-two-fold for *kdgN* between 170 and 330 mOsM. Subsequently, expression decreased two-fold for both genes between 330 and 500 mOsM, and two-fold for *ompF* when osmolarity increased to 700 mOsM. In *envZ* or *ompR* single mutants, regulation was completely lost showing that *ompF* and *kdgN* are part of the regulon (Figure 6A, B). Both genes followed a classic bell curve observed for gene regulation by EnvZ-OmpR in *E. coli* (Lan and Igo, 1998). Interestingly, in the *opgG* mutant, regulation was completely lost (Figure 6A, B). At 170 mOsM, the expression level of *ompF* or *kdgN* in the OPG-defective strain was at a similar level to wild-type, regardless of medium osmolarity. These data indicate that the EnvZ-OmpR system regulates expression of *ompF* and *kdgN* in an OPG-dependent manner.

#### **OPGs are not required for the activation of the CpxAR two-component system**

To show whether two-component system dysfunction is a general feature of bacteria lacking OPGs, we investigated the potential relationship between another two-component system and OPGs. Among the thirty-two two-component systems in *D. dadantii*, three systems are involved in sensing stress: RcsCDB, EnvZ-OmpR and CpxAR. CpxAR is involved in perception of envelope stress (Bontemps-Gallo et al., 2015). Inactivation of this system in an

Deleted: After

Deleted: the

Deleted: severity

Deleted: the

Deleted: or the severity of the virulence

Deleted: infectious

Deleted:

Deleted: the

Deleted: the

Deleted: the

Deleted: mutant

Deleted: demonstrated

Deleted: the

Deleted: the

Deleted: the pectate-lyase

Deleted: allowed the formation of

Deleted: a

Deleted: tuber

Deleted: were

Deleted: required

Deleted: to be regulated

Deleted: the

Deleted: the

Deleted: the

Deleted: Expressions

Deleted: Then

Deleted: only

Deleted: the

Deleted: regulated

Deleted: the

Deleted: The

Deleted:

Deleted: than at 170 mOsM for the

Deleted: the

Deleted: of the medium.

Deleted: regulate

Deleted: if

Deleted: systems

Deleted: OPG-devoid

517 *opgG* background does not restore any phenotype (Bontemps Gallo, 2013). CpxAR ~~regulates~~  
 518 *spy*, encoding for a periplasmic chaperon, and *degP*, a periplasmic protease (Bontemps-Gallo  
 519 et al., 2015). As ~~previously~~ observed, expression of *spy* (Figure 6C) and *degP* (Figure 6D) were  
 520 up-regulated in a *cpxA* background and down-regulated for *spy* or similar to wild-type for *degP*  
 521 in a *cpxR* background (Figure 6C, D) (Bontemps-Gallo et al., 2015). Disruption of *opgG* does  
 522 not affect the regulation of *spy* or *degP* by ~~the~~ CpxAR system (Figure 6C, D). Taken together,  
 523 our data ~~shows~~ that OPGs ~~have~~ a specific relationship with ~~certain~~ two-component systems.

Deleted: regulate

Deleted: before

Deleted: showed

Deleted: has

Deleted: particular

Deleted: was

Deleted:

Deleted: subjected

Deleted: fluctuation

Deleted: component

Deleted: demonstrate

## 525 Periplasmic size ~~is~~ maintained in an OPG~~-~~defective mutant.

526 Periplasmic size is ~~subject~~ to ~~fluctuations~~ during osmotic stress (Bohin and Lacroix,  
 527 2006) and loss of OPGs, major periplasmic ~~components~~ representing up to 5% of the dry weight  
 528 of a cell, could affect this size. Recently, Asmar *et al.* ~~demonstrated~~ that activation of two-  
 529 component systems also relies on the distance between the two membranes (Asmar et al., 2017).  
 530 To determine whether change in periplasm width may be one of the consequences of ~~a~~ lack of  
 531 EnvZ-OmpR system ~~activation~~ in the *opgG* mutant, we grew ~~bacteria~~ until mid-log phase in  
 532 low and high osmolarities and analyzed ~~cell ultrastructure~~ using transmission electron  
 533 microscopy (Figure 7). At low osmolarity (Figure 7A, B), ~~cells~~ exhibited an ~~altered~~ cytoplasmic  
 534 ~~content~~ with small dense ~~granules being observed~~. Since poly-phosphate granules, often  
 535 accumulated by *D. dadantii*, ~~typically appear~~ white ~~by~~ TEM (Ogawa et al., 2000; Ayraud et al.,  
 536 2005; Stumpf and Foster, 2005), ~~we suspect~~ that the black granules are filled ~~with~~ ferrous poly-  
 537 phosphates (Lechaire et al., 2002). This cytoplasmic modification had no effect on the growth  
 538 of *D. dadantii*. At high osmolarity (Figure 7), the cell displayed a classic ~~rod~~-shaped form.  
 539 Despite the strong ~~structural~~ difference observed for bacteria grown in low and high  
 540 osmolarities, no significant difference was observed in bacterial structure between the wild-  
 541 type and the *opgG* mutant ~~strains~~ at ~~any~~ osmolarity. In addition, no relevant difference in  
 542 periplasmic size ~~was observed~~ between the wild-type and the *opgG* mutant. Both strains  
 543 displayed an equivalent periplasmic space: 23.99 nm +/- 3.26 for ~~wild-type~~ and 22.92 nm +/-  
 544 3.04 for the OPG~~-~~defective strain at low osmolarity and 22.23 nm +/- 3.21 for ~~wild-type~~ and  
 545 24.28 nm +/- 3.41 for the OPG~~-~~defective strain at high osmolarity (Figure 7E). ~~This suggests~~  
 546 that OPGs are not involved in control of periplasmic size. These ~~periplasmic space~~  
 547 ~~measurements~~ are similar to those observed ~~by~~ Asmar *et al.* for the closely related *E. coli*  
 548 Enterobacterium in LB medium (around 350 mOsM) (Asmar et al., 2017). Taken together, the  
 549 gene expression experiments and the microscopy observations strongly suggest that EnvZ-

Deleted: the

Deleted: the

Deleted: activation of the

Deleted: the cell

Deleted: by

Deleted: the cell ultrastructure

Deleted: the cell

Deleted: unusual

Deleted: aspect displaying a

Deleted: granule. Because

Deleted: appears classically

Deleted: on

Deleted: one can imagine

Deleted: by

Deleted: .C.D

Deleted: rot

Deleted: in structure

Deleted: strain

Deleted: each

Deleted: could be measured

Deleted: the

Deleted:

Deleted: the

Deleted:

Deleted: ) suggesting

Deleted: measurements of

Deleted: in

588 OmpR **requires** OPGs in the periplasm to be able to sense the osmolarity but **that this sensing**  
 589 **is not based on** periplasmic size.

Deleted: required

Deleted: via the

591 **Increasing concentrations of OPGs do not affect the level of EnvZ-OmpR system**  
 592 **activation**

Deleted: did

Deleted: activation

Deleted: the

Deleted: level

593 Previously, we demonstrated that the **level of RcsCDB** activation is controlled by the  
 594 **concentration of OPGs** (Bontemps-Gallo et al., 2013). **Therefore, we examined whether the**  
 595 **concentration of OPGs** could also modulate the **level of EnvZ-OmpR** activation (Figure 8). **For**  
 596 **this, we** used a system **in which** the *opgGH* operon is under the control of the  $P_{BAD}$  promoter  
 597 from *E. coli*. **Control of L-arabinose concentration, enables** tight regulation **of the *opgGH***  
 598 **operon** (Guzman et al., 1995). We grew the  $P_{BAD}$ -*opgGH*, *envZ*  $P_{BAD}$ -*opgGH*, *ompR*  $P_{BAD}$ -  
 599 *opgGH*, as well as the wild-type and *opgG* strains, in M63 medium **at** various L-arabinose  
 600 concentrations ranging from 0 - 1 g/L. We first **confirmed that** expression of **the *opgG* and *opgH***  
 601 **genes increased in line** with increasing **concentration of L-arabinose** (Figure 8A, B). **As shown**  
 602 **previously, without L-arabinose, no OPG is detected. OPG concentration increased in**  
 603 **accordance with L-arabinose concentration, as described** previously (Bontemps-Gallo et al.,  
 604 2013). We then analyzed the expression of *ompF* and *kdgN* in **the same strains under the same**  
 605 conditions. (Figure 8C, D). Without L-arabinose, expression of *ompF* and *kdgN* in the  $P_{BAD}$ -  
 606 *opgGH* strain was similar to **that measured for the *opgG* mutant** (Figures 6, 8C, D). In **the**  
 607 presence of L-arabinose, regardless **of the concentration**, the expression of both genes was  
 608 similar to expression in the wild-type **strain** (Figures 6, 8C, D). **Inactivation of either *envZ* or**  
 609 ***ompR* in the  $P_{BAD}$ -*opgGH* strain** lead to a low expression level regardless **of the presence of L-**  
 610 **arabinose. Our data show** that OPGs are required for **transmission of the sensing signal but that**  
 611 **they do** not control the level of **EnvZ-OmpR** activation.

Deleted: OPGs

Deleted: We

Deleted: if

Deleted: concentrations

Deleted: level

Deleted: We

Deleted: were

Deleted: This promoter allowed a

Deleted: by the concentration of L-arabinose through the AraC protein

Deleted: containing

Deleted: g/L to

Deleted: measured the

Deleted: and observed that the expression of the *opgGH* operon

Deleted: concomitantly

Deleted: concentrations

Deleted: ) leading to an increase of the OPGs concentration as

Deleted: those

Deleted: and

Deleted: the

Deleted: what was

Deleted: in

Deleted: amount

Deleted: Inactivating

Deleted: *OmpR*

Deleted: showed

Deleted: the

Deleted: did

Deleted: of EnvZ-OmpR

## 613 Discussion

614 Since their first characterization in 1973 by E.P. Kennedy's group at Harvard Medical  
 615 School, the osmoregulated periplasmic glucans have been described to play an important role  
 616 in osmoprotection (Kennedy, 1982; Lacroix, 1989; Breedveld and Miller, 1994; Cayley et al.,  
 617 2000; Bontemps-Gallo et al., 2017), in envelope structure (Delcour et al., 1992; Banta et al.,  
 618 1998; Bontemps-Gallo et al., 2017), in virulence (Bhagwat et al., 2009) **as well as** in cell  
 619 signaling (Fiedler and Rotering, 1988; Ebel et al., 1997; Bouchart et al., 2010). Among the  
 620 different **models** used to study the biological function of this carbohydrate, *D. dadantii* is **the**  
 621 most developed model for understanding **their** role in virulence and cell signaling.

Deleted: but also

Deleted: model

Deleted: actually

Deleted: the

661 The ~~mutant~~ devoid ~~of~~ OPG is described ~~as having~~ a complex pleiotropic phenotype:  
 662 ~~increased~~ mucoid ~~appearance~~ (Breedveld and Miller, 1994; Ebel et al., 1997; Page et al., 2001),  
 663 ~~a decrease in~~ motility (Fiedler and Rotering, 1988; Page et al., 2001; Bhagwat et al., 2009) and  
 664 ~~a~~ loss of virulence (Bontemps-Gallo and Lacroix, 2015). The mucoid ~~appearance~~ of ~~bacterial~~  
 665 ~~colonies~~ is the consequence of activation of the RcsCDB two-component system (Bouchart et  
 666 al., 2010; Bontemps-Gallo et al., 2013). This activation leads to up-regulation of the *eps* operon  
 667 (Ebel et al., 1997; Bouchart et al., 2010), ~~the genes of which are~~ responsible ~~for synthesis~~ of  
 668 exopolysaccharides. The dramatic decrease ~~in~~ motility is also demonstrated to be a consequence  
 669 of ~~inactivation of~~ the RcsCDB two-component system (Bouchart et al., 2010; Bontemps-Gallo  
 670 et al., 2013; Bontemps-Gallo and Lacroix, 2015). Here, we showed that if EnvZ-OmpR is  
 671 involved in co-regulation of ~~motility~~, ~~inactivation of the system cannot restore~~ ~~motility in a~~  
 672 strain ~~lacking OPGs~~ (Figure 3).

673 Loss of virulence, certainly the most investigated phenotype, is more complex to  
 674 explain. Several mutations have now been described ~~that~~ partially, (in genes encoding RcsCDB  
 675 (Bouchart et al., 2010), KdgR, PecT (Bontemps-Gallo et al., 2014)) or fully ~~restore virulence~~  
 676 (in the gene encoding PecS (Bontemps-Gallo et al., 2014)) in *D. dadantii*. Restoration of  
 677 ~~virulence in potato tubers~~, ~~reserve organs~~, ~~depends only on~~ the ability to restore full production  
 678 of pectinase (Bontemps-Gallo et al., 2014). Restoration of virulence ~~in~~ non-reserve ~~organs~~  
 679 ~~requires restoration of~~ more factors, ~~as~~ bacteria will ~~encounter~~ several plant defense  
 680 mechanisms (e.g. ~~the~~ oxidative burst) (Reverchon and Nasser, 2013; Bontemps-Gallo et al.,  
 681 2014). In this study, we showed that inactivation of the EnvZ-OmpR system partially ~~restores~~  
 682 virulence in potato tubers (Figure 4) but not in chicory leaves (Figure 5). The result matched  
 683 with the restoration of the ~~pectinase~~ production (Figure 1).

684 Finally, the second major finding of this study is the requirement ~~for OPGs~~ for activation  
 685 of ~~the~~ EnvZ-OmpR ~~system~~. In *E. coli*, ~~the~~ EnvZ-OmpR ~~system senses~~ osmolarity in ~~an~~  
 686 unknown manner and ~~modulates~~ expression of ~~genes necessary for adaptation to the new~~  
 687 ~~conditions~~ (Forst and Roberts, 1994; Castillo-Keller et al., 2006). ~~This~~ system is characterized  
 688 both as a repressor (high osmolarity) and as an activator (low osmolarity) of *ompF* in *E. coli*  
 689 (Lan and Igo, 1998). Surprisingly, in *D. dadantii*, ~~the~~ EnvZ-OmpR ~~system~~ only acts as an  
 690 activator (Figure 6). This activation required ~~OPGs~~ in the periplasm (Figure 6). In contrast ~~to~~  
 691 RcsCDB (Bontemps-Gallo et al., 2013), periplasmic ~~OPG~~ concentration does not affect the  
 692 level of activation of the EnvZ-OmpR ~~system~~ (Figure 8). The relationship between EnvZ-  
 693 OmpR and OPGs is most likely indirect ~~yet~~ specific, since the CpxAR system was not affected  
 694 by OPGs (Figure 6).

Deleted: OPG

Deleted: mutant

Deleted: to have

Deleted: aspect of the cell

Deleted: decreased of the

Deleted: aspect

Deleted: the colony

Deleted: the

Deleted: the

Deleted: synthesis

Deleted: of the

Deleted: activation

Deleted: the

Deleted: the

Deleted: the

Deleted: the

Deleted: an OPG devoid

Deleted: to restore

Deleted: virulence

Deleted: the

Deleted: a

Deleted: organ, depend

Deleted: of

Deleted: on

Deleted: organ required to restore

Deleted: because the

Deleted: have to

Deleted: restored the

Deleted: pectate-lyase

Deleted: of OPG

Deleted: systems sense

Deleted: on yet

Deleted: modulate

Deleted: the adequate gene

Deleted: adapt to

Deleted: condition

Deleted: The

Deleted: OPG

Deleted: of

Deleted: OPGs

Deleted: but is

Deleted: Several questions remain open and will required more investigations. Do other two-component systems require OPGs to be functional in *D. dadantii*? Do the specific relationship between RcsCDB or EnvZ-OmpR system and the OPGs also exist in neighboring bacterial species? Furthermore, the more intriguing feature is by which mechanism(s) OPGs modulate two-component system activation.

Several questions remain and require further investigations. Do other two-component systems need OPGs to be functional in *D. dadantii*? Preliminary data from our laboratory suggests that, among the thirty-two two-component systems, only RcsCDB and EnvZ-OmpR activation is affected by OPG presence/concentration. Does the specific relationship between the RcsCDB or EnvZ-OmpR system and OPGs also exist in phylogenetically closely-related bacterial species? In non-pathogenic *E. coli*, inactivation of RcsCDB or EnvZ-OmpR restores motility in an *opgG* mutant (Fiedler and Rotering, 1988; Girgis et al., 2007). In *Salmonella enterica* Serovar Typhimurium, inactivation of RcsCDB restores motility but not virulence in mice (Kannan et al., 2009). However, the relationship between OPGs and two-component systems has not been investigated in other bacteria. Finally, the more intriguing feature is the mechanism(s) by which OPGs modulate two-component system activation.

## Table

Table 1: **Strains** used in the study

| Strain  | Relevant Genotype and/or phenotype <sup>a</sup>                                 | Source or Reference           |
|---------|---------------------------------------------------------------------------------|-------------------------------|
| EC3937  | wild-type                                                                       | Laboratory collection         |
| NFB3723 | <i>opgG</i> ::Cml                                                               | (Bontemps-Gallo et al., 2013) |
| NFB3835 | <i>opgG</i> ::Cml miniTn5 P <sub>BAD</sub> - <i>opgGH</i> -Spe                  | (Bontemps-Gallo et al., 2013) |
| NFB7422 | <i>ompR</i> ::Gm                                                                | (Bontemps-Gallo et al., 2016) |
| NFB7423 | <i>ompR</i> ::Gm <i>opgG</i> ::Cml                                              | This study                    |
| NFB7440 | <i>ompR</i> ::Gm <i>opgG</i> ::Cml miniTn5 P <sub>BAD</sub> - <i>opgGH</i> -Spe | This study                    |
| NFB7515 | <i>cpxA</i> ::Gm                                                                | (Bontemps-Gallo et al., 2015) |
| NFB7521 | <i>envZ</i> ::Gm                                                                | (Bontemps-Gallo et al., 2016) |
| NFB7524 | <i>envZ</i> ::Gm <i>opgG</i> ::Cml                                              | This study                    |
| NFB7532 | <i>cpxR</i> ::Gm                                                                | (Bontemps-Gallo et al., 2015) |
| NFB7534 | <i>cpxR</i> <i>opgG</i> ::Cml                                                   | This study                    |
| NFB7632 | <i>cpxA</i> ::Gm <i>opgG</i> ::Cml                                              | This study                    |
| NFB7731 | <i>envZ</i> ::Gm <i>opgG</i> ::Cml miniTn5 P <sub>BAD</sub> - <i>opgGH</i> -Spe | This study                    |

<sup>a</sup>: Cml: chloramphenicol resistance, Gm: Gentamicin resistance, Spe: spectinomycin resistance.

P<sub>BAD</sub>-*opgGH* fusion is carried by a mini-Tn5.

Table 2: qPCR **primers**

| Primer | Sequence                      | Efficiency | Reference              |
|--------|-------------------------------|------------|------------------------|
| ompF-F | CGT AAC TCT GGT GTT GCT ACT T | 1.843      | This study             |
| ompF-R | AGT CGC TAT GTG CTG ATT GG    |            |                        |
| kdgN-F | CCT GCG TTA TCG TCC TTT CTA C | 1.428      | This study             |
| kdgN-R | CAG CAC GCT GGT AAT GGT ATA G |            |                        |
| ompR-F | GCT CGA TTG ATG TGC AGA TTT C | 1.904      | This study             |
| ompR-R | ACA AAG ACG TAG CCC AAC C     |            |                        |
| envZ-F | CTG GCG GAG TCG ATC AAT AA    | 1.652      | This study             |
| envZ-R | GCC ACT TCC ATC TGC ATT TC    |            |                        |
| spy-F  | CGG AAG GCG TAG TCA ATC AA    | 1.943      | This study             |
| spy-R  | TTT CTG TTC CGG CGT CAA       |            |                        |
| degP-F | CCA GAT TGT CGA ATA CGG AGA G | 1.733      | This study             |
| degP-R | GCA TCC ACT TTC ATG GCT TTA G |            |                        |
| opgG-F | CCG GAA CAG GCT TAT GTG AT    | 1.774      | This study             |
| opgG-R | AAT CGA CCA GGA ATG CAG TAG   |            |                        |
| opgH-F | GGA ACT GGC GAT AGC TTT GT    | 1.547      | This study             |
| opgH-R | CCA CTC CGC CGT ATG ATT TAG   |            |                        |
| flhD-F | TCG GTT GGG TAT CAA TGA AGA A | 1.815      | This study             |
| flhD-R | TCA CTG AAG CGG AAA TGA CAT A |            |                        |
| fliC-F | CAC GGC TCA TGT TGG ATA CT    | 1.676      | This study             |
| fliC-R | CA TTG ACA ACC TGA GCA ACA C  |            |                        |
| ipxC-F | AAA TCC GTG CGT GAT ACC AT    | 1.862      | (Hommais et al., 2011) |
| ipxC-R | CAT CCA GCA GCA GGT AGA CA    |            |                        |

Formatted Table

Table 3: Protease activity

Protease activities were observed on **plates** by the presence of a clear halo and marked as '+'. Deleted: plate

Data represent **observations** from three independent experiments. Deleted: observation

Strain

|                  |   |
|------------------|---|
| Wild-type        | + |
| <i>opgG</i>      | - |
| <i>envZ</i>      | + |
| <i>envZ opgG</i> | - |

Formatted Table



*ompR* +  
*ompR opgG* -

## Figure Legend

Figure 1: Characterization of the *envZ* and *ompR* deletion in wild-type and *opgG* background. (A) Schematic of the *envZ-ompR* locus in the wild-type, **strain and genetic organization of the mutant strains**. (B) Expression of *envZ* and *ompR* **was** analyzed by qPCR. Bacteria were grown at 170, 330, 500 and 700 mOsM. Relative gene expression was calculated using *ipxC* as a reference (Hommais et al., 2011). Data represent mean +/- standard deviation of three independent experiments. **An asterisk indicates** a significant difference with  $p < 0.0001$ .

Figure 2: **Pectinase** (A) and cellulase (B) activities  
 Exoenzyme activities were estimated on plates by measurement of halo diameters, expressed in cm of substrate degradation. Data represent mean +/- standard deviation of twenty independent experiments. **An asterisk indicates** a significant difference with  $p < 0.0001$

Figure 3: Effect of EnvZ-OmpR on motility in wild-type and *opgG* background. (A) Motility of wild-type, *opgG*, *envZ*, *envZ opgG*, *ompR*, *ompR opgG* strains. Motility was measured in M63 semisolid plates. Swim diameters were measured after 48h of incubation at 30°C. (B) Schematic of the regulatory cascade of motility. FlhDC, a master regulator and a class I promoter, modulate gene expression with a class II promoter (e.g. *fliA*). In return, the products of those **genes** regulate **genes** with a class **III** promoter (e.g. *fliC*). (C-D). Expression of (C) *flhD* and (D) *fliC* in wild-type, *opgG*, *envZ*, *envZ opgG*, *ompR* and *ompR opgG*, strains Bacteria were grown at 170, 330, 500 and 700 mOsM. The expression of (C) *flhD*, (D) *fliC* **was** analyzed by qPCR. Relative gene expression was calculated using *ipxC* as a reference (Hommais et al., 2011). Data represent mean +/- standard deviation of ten independent experiments. **An asterisk indicates** a significant difference with  $p < 0.0001$  for \*\*\*\*,  $p < 0.001$  for \*\*\*,  $p < 0.01$  for \*\* and  $p < 0.05$  for \*.

Figure 4: Weight of maceration on potato tubers for wild-type, *opgG*, *envZ*, *envZ opgG*, *ompR*, *ompR opgG* strains. Bacteria were inoculated into holes on potato tubers. Maceration (g) was weighed after 72h of incubation at 30°C. Data represent mean +/- standard deviation of at least ten independent experiments.

Figure 5: Pathogenicity of wild-type, *opgG*, *envZ*, *envZ opgG*, *ompR*, *ompR opgG* strains on chicory leaves. Bacteria were inoculated into scarified chicory leaves. Disease symptoms were observed after 48h of incubation at 30°C. The results presented are one of the three independent experiments performed.

Figure 6: Expression of (A) *ompF* and (B) *kdgN* in wild-type, *opgG*, *envZ*, *envZ opgG*, *ompR* and *ompR opgG*, strains and of (C) *spy* and (D) *degP* in wild-type, *opgG*, *cpxA*, *cpxA opgG*, *cpxR*, *cpxR opgG* strains at various osmolarities Bacteria were grown at 170, 330, 500 and 700 mOsM. The expression of (A) *ompF*, (B) *kdgN* (C) *spy* and (D) *degP* were analyzed by qPCR. Relative gene expression was calculated using

Deleted: .

Deleted: were

Deleted: Asterisk indicate

Deleted: Pectate-lyase

Deleted: the

Deleted: Asterisk indicate

Deleted: gene

Deleted: gene

Deleted: II

Deleted: were

Deleted: Asterisk indicate



826 *ipxC* as a reference (Hommais et al., 2011). Data represent mean +/- standard deviation of three  
 827 independent experiments. ~~An asterisk indicates~~ a significant difference with  $p < 0.0001$  for \*\*\*\*  
 828 and  $p < 0.01$  for \*\*.

Deleted: Asterisk indicate

830 Figure 7: Transmission electron microscopy images of wild-type (A, C) and *opgG* mutant (B,  
 831 D) at low osmolarity (A, B) and high osmolarity (C, D).

832 ~~Images show~~ similar architecture ~~for~~ both strains ~~when grown~~ in the same medium but  
 833 differences ~~when~~ osmolarity ~~is varied~~. (E) Periplasm size (nm) from TEM images.

Deleted: Picture revealed

Deleted: in

Deleted: between both

835 Figure 8: Effect of OPG concentration on expression of *opgG*, *opgH*, *ompF*, and *kdgN*.  
 836 Bacteria were grown in M63 medium (330 mOsM) with increasing L-arabinose concentration  
 837 ranging from 0 ~~to~~ 1 g/L. The expression of (A) *opgG*, (B) *opgH*, (C) *ompF*, and (D) *kdgN* ~~was~~  
 838 analyzed by qPCR. Relative gene expression was calculated using *ipxC* as a reference  
 839 (Hommais et al., 2011). Data represent mean +/- standard deviation of three independent  
 840 experiments. ~~An asterisk indicates~~ a significant difference with  $p < 0.0001$  for \*\*\*\*,  $p < 0.001$   
 841 for \*\*\*,  $p < 0.01$  for \*\* and  $p < 0.05$  for \*.

Deleted: g/L to

Deleted: were

Deleted: Asterisk indicate

## 843 Acknowledgements

844 We thank Loic Brunet for the electronic microscopy. ~~We are grateful to Dr Ciaran Finn for the~~  
 845 ~~manuscript improvements.~~

846 This study was supported by the Centre National de la Recherche Scientifique (CNRS), the  
 847 Université de Lille Sciences et Technologies and the Ministère de l'Enseignement Supérieur et  
 848 de la Recherche. ~~MC~~ and SBG were funded by a doctoral fellowship of Lille University. ~~The~~  
 849 ~~funding bodies~~ were not involved in the study design, data collection and analysis, decision to  
 850 publish, or preparation of the manuscript.

Formatted: Justified

Deleted: CM

Deleted: ~~the~~

Deleted: funders

## 852 Author contributions

853 SBG and JML conceived, designed ~~the~~ study and wrote the manuscript. ~~MC~~ and SBG  
 854 ~~performed~~ all experiments with the assistance of EM, PG, BD, ~~MC~~, SBG, EM, and JML  
 855 analyzed the data.

Deleted: this

Deleted: CM

Deleted: carried out

Deleted: the

Deleted: . CM

## 857 References

- 859 Asmar, A.T., Ferreira, J.L., Cohen, E.J., Cho, S.H., Beeby, M., Hughes, K.T., et al. (2017).  
 860 Communication across the bacterial cell envelope depends on the size of the  
 861 periplasm. *PLoS Biol* 15(12), e2004303. doi: 10.1371/journal.pbio.2004303.  
 862 Ayraud, S., Janvier, B., Labigne, A., Ecobichon, C., Burucoa, C., and Fauchere, J.L. (2005).  
 863 Polyphosphate kinase: a new colonization factor of *Helicobacter pylori*. *FEMS*  
 864 *Microbiol Lett* 243(1), 45-50. doi: 10.1016/j.femsle.2004.11.040.

880 Banta, L.M., Bohne, J., Lovejoy, S.D., and Dostal, K. (1998). Stability of the *Agrobacterium*  
881 *tumefaciens* VirB10 protein is modulated by growth temperature and  
882 periplasmic osmoadaptation. *J Bacteriol* 180(24), 6597-6606.

883 Barbieri, C.M., Wu, T., and Stock, A.M. (2013). Comprehensive analysis of OmpR  
884 phosphorylation, dimerization, and DNA binding supports a canonical model for  
885 activation. *J Mol Biol* 425(10), 1612-1626. doi: 10.1016/j.jmb.2013.02.003.

886 Barker, C.S., Pruss, B.M., and Matsumura, P. (2004). Increased motility of *Escherichia coli*  
887 by insertion sequence element integration into the regulatory region of the *flhD*  
888 operon. *J Bacteriol* 186(22), 7529-7537. doi: 10.1128/JB.186.22.7529-  
889 7537.2004.

890 Bertani, G. (2004). Lysogeny at Mid-Twentieth Century: P1, P2, and Other Experimental  
891 Systems. *J. Bacteriol.* 186(3), 595-600. doi: 10.1128/jb.186.3.595-600.2004.

892 Bhagwat, A.A., Jun, W., Liu, L., Kannan, P., Dharne, M., Pheh, B., et al. (2009).  
893 Osmoregulated periplasmic glucans of *Salmonella enterica* serovar Typhimurium  
894 are required for optimal virulence in mice. *Microbiology* 155(Pt 1), 229-237. doi:  
895 10.1099/mic.0.023747-0.

896 Bohin, J.P., and Lacroix, J.M. (2006). "Osmoregulation in the periplasm," in *The Periplasm*,  
897 ed. M. Ehrmann. (Washington, DC, USA: American Society for Microbiology), pp.  
898 325-341.

899 Bontemps Gallo, S. (2013). *Dickeya dadantii: Towards the understanding of the biological*  
900 *role of the osmoregulated periplasmic glucans (in French)*. PhD thesis, Université  
901 de Lille.

902 Bontemps-Gallo, S., Bohin, J.P., and Lacroix, J.M. (2017). Osmoregulated Periplasmic  
903 Glucans. *EcoSal Plus* 7(2). doi: 10.1128/ecosalplus.ESP-0001-2017.

904 Bontemps-Gallo, S., and Lacroix, J.M. (2015). New insights into the biological role of the  
905 osmoregulated periplasmic glucans in pathogenic and symbiotic bacteria. *Environ*  
906 *Microbiol Rep* 7(5), 690-697. doi: 10.1111/1758-2229.12325.

907 Bontemps-Gallo, S., Madec, E., Dondeyne, J., Delrue, B., Robbe-Masselot, C., Vidal, O., et al.  
908 (2013). Concentration of osmoregulated periplasmic glucans (OPGs) modulates  
909 the activation level of the RcsCD RcsB phosphorelay in the phytopathogen  
910 bacteria *Dickeya dadantii*. *Environ Microbiol* 15(3), 881-894. doi: 10.1111/1462-  
911 2920.12054.

912 Bontemps-Gallo, S., Madec, E., and Lacroix, J.M. (2014). Inactivation of *pecS* restores the  
913 virulence of mutants devoid of osmoregulated periplasmic glucans in the  
914 phytopathogenic bacterium *Dickeya dadantii*. *Microbiology* 160(Pt 4), 766-777.  
915 doi: 10.1099/mic.0.074484-0.

916 Bontemps-Gallo, S., Madec, E., and Lacroix, J.M. (2015). The two-component system  
917 CpxAR is essential for virulence in the phytopathogen bacteria *Dickeya dadantii*  
918 EC3937. *Environ Microbiol* 17(11), 4415-4428. doi: 10.1111/1462-2920.12874.

919 Bontemps-Gallo, S., Madec, E., Robbe-Masselot, C., Souche, E., Dondeyne, J., and Lacroix,  
920 J.M. (2016). The *opgC* gene is required for OPGs succinylation and is  
921 osmoregulated through RcsCDB and EnvZ/OmpR in the phytopathogen *Dickeya*  
922 *dadantii*. *Sci Rep* 6, 19619. doi: 10.1038/srep19619.

923 Bouchart, F., Boussemart, G., Prouvost, A.F., Cogez, V., Madec, E., Vidal, O., et al. (2010).  
924 The virulence of a *Dickeya dadantii* 3937 mutant devoid of osmoregulated  
925 periplasmic glucans is restored by inactivation of the RcsCD-RcsB phosphorelay. *J*  
926 *Bacteriol* 192(13), 3484-3490. doi: 10.1128/JB.00143-10.

927 Bouchart, F., Delangle, A., Lemoine, J., Bohin, J.P., and Lacroix, J.M. (2007). Proteomic  
928 analysis of a non-virulent mutant of the phytopathogenic bacterium *Erwinia*

chrysanthemi deficient in osmoregulated periplasmic glucans: change in protein expression is not restricted to the envelope, but affects general metabolism. *Microbiology* 153(Pt 3), 760-767. doi: 10.1099/mic.0.2006/000372-0.

Breedveld, M.W., and Miller, K.J. (1994). Cyclic beta-glucans of members of the family Rhizobiaceae. *Microbiol Rev* 58(2), 145-161.

Castillo-Keller, M., Vuong, P., and Misra, R. (2006). Novel mechanism of Escherichia coli porin regulation. *J Bacteriol* 188(2), 576-586. doi: 10.1128/JB.188.2.576-586.2006.

Cayley, D.S., Guttman, H.J., and Record, M.T., Jr. (2000). Biophysical characterization of changes in amounts and activity of Escherichia coli cell and compartment water and turgor pressure in response to osmotic stress. *Biophys J* 78(4), 1748-1764.

Charkowski, A., Blanco, C., Condemine, G., Expert, D., Franza, T., Hayes, C., et al. (2012). The role of secretion systems and small molecules in soft-rot Enterobacteriaceae pathogenicity. *Annu Rev Phytopathol* 50, 425-449. doi: 10.1146/annurev-phyto-081211-173013.

Clemmer, K.M., and Rather, P.N. (2007). Regulation of flhDC expression in Proteus mirabilis. *Res Microbiol* 158(3), 295-302. doi: 10.1016/j.resmic.2006.11.010.

Collmer, A., and Keen, N.T. (1986). The Role of Pectic Enzymes in Plant Pathogenesis. *Annual Review of Phytopathology* 24(1), 383-409. doi: 10.1146/annurev.py.24.090186.002123.

Condemine, G., and Ghazi, A. (2007). Differential regulation of two oligogalacturonate outer membrane channels, KdgN and KdgM, of Dickeya dadantii (Erwinia chrysanthemi). *J Bacteriol* 189(16), 5955-5962. doi: 10.1128/JB.00218-07.

Cowan, S.W., Schirmer, T., Rummel, G., Steiert, M., Ghosh, R., Pauptit, R.A., et al. (1992). Crystal structures explain functional properties of two E. coli porins. *Nature* 358(6389), 727-733. doi: 10.1038/358727a0.

Delcour, A.H., Adler, J., Kung, C., and Martinac, B. (1992). Membrane-derived oligosaccharides (MDO's) promote closing of an E. coli porin channel. *FEBS Lett* 304(2-3), 216-220.

Ebel, W., Vaughn, G.J., Peters, H.K., 3rd, and Trempey, J.E. (1997). Inactivation of mdoH leads to increased expression of colanic acid capsular polysaccharide in Escherichia coli. *J Bacteriol* 179(21), 6858-6861.

Egger, L.A., Park, H., and Inouye, M. (1997). Signal transduction via the histidyl-aspartyl phosphorelay. *Genes Cells* 2(3), 167-184.

EPPO (1982). "Data sheets on quarantine organisms, Erwinia chrysanthemi Burkholder.", in: *Bull OEPP*.

EPPO (1988). A1 and A2 Lists of Quarantine Pests. Specific Quarantine Requirements. *EPPO/EPPO Publications Series B no. 92*.

EPPO (1990). Specific Quarantine Requirements. *EPPO Technical Documents no. 1008*.

Fiedler, W., and Rotering, H. (1988). Properties of Escherichia coli mutants lacking membrane-derived oligosaccharides. *J Biol Chem* 263(29), 14684-14689.

Forst, S.A., and Roberts, D.L. (1994). Signal transduction by the EnvZ-OmpR phosphotransfer system in bacteria. *Res Microbiol* 145(5-6), 363-373.

Gao, H., Zhang, Y., Han, Y., Yang, L., Liu, X., Guo, Z., et al. (2011). Phenotypic and transcriptional analysis of the osmotic regulator OmpR in Yersinia pestis. *BMC Microbiol* 11, 39. doi: 10.1186/1471-2180-11-39.

[Girgis, H.S., Liu, Y., Ryu, W.S. and Tavazoie, S. \(2007\) A comprehensive genetic characterization of bacterial motility. PLoS Genet 3\(9\):1644-1660.](#)

977 Groisman, E.A. (2016). Feedback Control of Two-Component Regulatory Systems. *Annu*  
 978 *Rev Microbiol* 70, 103-124. doi: 10.1146/annurev-micro-102215-095331.  
 979 Guzman, L.M., Belin, D., Carson, M.J., and Beckwith, J. (1995). Tight regulation,  
 980 modulation, and high-level expression by vectors containing the arabinose PBAD  
 981 promoter. *J Bacteriol* 177(14), 4121-4130.  
 982 Hoch, J.A. (2000). Two-component and phosphorelay signal transduction. *Curr Opin*  
 983 *Microbiol* 3(2), 165-170.  
 984 Hommais, F., Zghidi-Abouzid, O., Oger-Desfeux, C., Pineau-Chapelle, E., Van Gijsegem, F.,  
 985 Nasser, W., et al. (2011). lpxC and yafS are the most suitable internal controls to  
 986 normalize real time RT-qPCR expression in the phytopathogenic bacteria *Dickeya*  
 987 *dadantii*. *PLoS One* 6(5), e20269. doi: 10.1371/journal.pone.0020269.  
 988 Jiang, X., Zghidi-Abouzid, O., Oger-Desfeux, C., Hommais, F., Greliche, N., Muskhelishvili,  
 989 G., et al. (2016). Global transcriptional response of *Dickeya dadantii* to  
 990 environmental stimuli relevant to the plant infection. *Environ Microbiol* 18(11),  
 991 3651-3672. doi: 10.1111/1462-2920.13267.  
 992 Kannan, P., Dharne, M., Smith, A., Karns, J. and Bhagwatt, A.A. (2009) Motility revertants  
 993 of *ompGH* mutants of *Salmonella enterica* serovar Typhimurium remain defective  
 994 in mice virulence. *Curr Microbiol* 59(6), 641-645.  
 995 Kennedy, E.P. (1982). Osmotic regulation and the biosynthesis of membrane-derived  
 996 oligosaccharides in *Escherichia coli*. *Proc Natl Acad Sci U S A* 79(4), 1092-1095.  
 997 Kennedy, E.P. (1996). "Membrane derived oligosaccharides (periplasmic beta-D-  
 998 glucans) of *Escherichia coli*," in *Escherichia coli and Salmonella. Cellular and*  
 999 *Molecular Biology*, eds. F.C. Neidhardt, R. Curtiss III, J.L. Ingraham, E.C.C. Lin, K.B.  
 1000 Low, B. Maganasik, W.S. Reznikoff, M. Riley, M. Schaechter & H.E. Umbarger. 2nd  
 1001 ed (Washington, D.C.: ASM Press), 1064-1074.  
 1002 Lacroix, J.-M. (1989). *Etude génétique et physiologique de la régulation osmotique de la*  
 1003 *biosynthèse du MDO chez Escherichia coli*. PhD thesis, Université de Paris-Sud.  
 1004 Lan, C.Y., and Igo, M.M. (1998). Differential expression of the OmpF and OmpC porin  
 1005 proteins in *Escherichia coli* K-12 depends upon the level of active OmpR. *J*  
 1006 *Bacteriol* 180(1), 171-174.  
 1007 Lechlaire, J.P., Shillito, B., Frebourg, G., and Gaill, F. (2002). Elemental characterization of  
 1008 microorganism granules by EFTEM in the tube wall of a deep-sea vent  
 1009 invertebrate. *Biol Cell* 94(4-5), 243-249.  
 1010 Lee, C., and Park, C. (2013). Mutations upregulating the flhDC operon of *Escherichia coli*  
 1011 K-12. *J Microbiol* 51(1), 140-144. doi: 10.1007/s12275-013-2212-z.  
 1012 Leonard, S., Hommais, F., Nasser, W., and Reverchon, S. (2017). Plant-phytopathogen  
 1013 interactions: bacterial responses to environmental and plant stimuli. *Environ*  
 1014 *Microbiol* 19(5), 1689-1716. doi: 10.1111/1462-2920.13611.  
 1015 Li, W., Ancona, V., and Zhao, Y. (2014). Co-regulation of polysaccharide production,  
 1016 motility, and expression of type III secretion genes by EnvZ/OmpR and  
 1017 GrrS/GrrA systems in *Erwinia amylovora*. *Mol Genet Genomics* 289(1), 63-75. doi:  
 1018 10.1007/s00438-013-0790-4.  
 1019 Miller, J.H. (1992). A short course in bacterial genetics: a laboratory manual and  
 1020 handbook for *Escherichia coli* and related bacteria. *Cold Spring Harbor Laboratory*  
 1021 *Press, New York*.  
 1022 Ogawa, N., Tzeng, C.M., Fraley, C.D., and Kornberg, A. (2000). Inorganic polyphosphate in  
 1023 *Vibrio cholerae*: genetic, biochemical, and physiologic features. *J Bacteriol*  
 1024 182(23), 6687-6693.

1025 Page, F., Altabe, S., Hugouvieux-Cotte-Pattat, N., Lacroix, J.M., Robert-Baudouy, J., and  
 1026 Bohin, J.P. (2001). Osmoregulated periplasmic glucan synthesis is required for  
 1027 *Erwinia chrysanthemi* pathogenicity. *J Bacteriol* 183(10), 3134-3141. doi:  
 1028 10.1128/JB.183.10.3134-3141.2001.  
 1029 Pruss, B.M. (2017). Involvement of Two-Component Signaling on Bacterial Motility and  
 1030 Biofilm Development. *J Bacteriol* 199(18). doi: 10.1128/JB.00259-17.  
 1031 Raczowska, A., Skorek, K., Bielecki, J., and Brzostek, K. (2011). OmpR controls *Yersinia*  
 1032 *enterocolitica* motility by positive regulation of flhDC expression. *Antonie Van*  
 1033 *Leeuwenhoek* 99(2), 381-394. doi: 10.1007/s10482-010-9503-8.  
 1034 Reboul, A., Lemaitre, N., Titecat, M., Merchez, M., Deloison, G., Ricard, I., et al. (2014).  
 1035 *Yersinia pestis* requires the 2-component regulatory system OmpR-EnvZ to resist  
 1036 innate immunity during the early and late stages of plague. *J Infect Dis* 210(9),  
 1037 1367-1375. doi: 10.1093/infdis/jiu274.  
 1038 Resibois, A., Colet, M., Faalen, M., Schoonejans, E., and Toussaint, A. (1984). phiEC2, a  
 1039 new generalized transducing phage of *Erwinia chrysanthemi*. *Virology* 137(1),  
 1040 102-112.  
 1041 Reverchon, S., Muskhelishvili, G., and Nasser, W. (2016). Virulence Program of a Bacterial  
 1042 Plant Pathogen: The *Dickeya* Model. *Prog Mol Biol Transl Sci* 142, 51-92. doi:  
 1043 10.1016/bs.pmbts.2016.05.005.  
 1044 Reverchon, S., and Nasser, W. (2013). *Dickeya* ecology, environment sensing and  
 1045 regulation of virulence programme. *Environ Microbiol Rep* 5(5), 622-636. doi:  
 1046 10.1111/1758-2229.12073.  
 1047 Stumpf, J.D., and Foster, P.L. (2005). Polyphosphate kinase regulates error-prone  
 1048 replication by DNA polymerase IV in *Escherichia coli*. *Mol Microbiol* 57(3), 751-  
 1049 761. doi: 10.1111/j.1365-2958.2005.04724.x.  
 1050 Tipton, K.A., and Rather, P.N. (2016). An ompR/envZ Two-Component System Ortholog  
 1051 Regulates Phase Variation, Osmotic Tolerance, Motility, and Virulence in  
 1052 *Acinetobacter baumannii* strain AB5075. *J Bacteriol*. doi: 10.1128/JB.00705-16.  
 1053 Toth, I., Van der Wolf, J., Saddler, G., Lojkowska, E., Hélias, V., Pirhonen, M., et al. (2011).  
 1054 *Dickeya* species: an emerging problem for potato production in Europe. *Plant*  
 1055 *Pathology* 60, 385-399. doi: 10.1111/j.1365-3059.2011.02427.x.  
 1056

Font: Italic
